# Supplementary material for: Clinical Effectiveness of Renal Transplant Outpatient Pharmaceutical Care Services in Korea
Source: MDPI journal article supplement (doi:10.3390/healthcare11182597), 2023-09-21
Supplement: s1 [file s1]

**Supplementary Table S1.** Baseline characteristics for sensitivity analysis

| Variables                             | Pre-Match         |               |       | Post-Match        |               |       |
|---------------------------------------|-------------------|---------------|-------|-------------------|---------------|-------|
|                                       | Control<br>N= 283 | PCS<br>N= 239 | STD   | Control<br>N= 167 | PCS<br>N= 167 | STD   |
| Sex (male)                            | 173 (61.1)        | 136 (56.9)    | 0.06  | 102 (61.1)        | 94 (56.3)     | 0.1   |
| Age (years)                           | 53.8 ± 14.4       | 54.0 ± 14.0   | 0.01  | 53.6 ± 14.5       | 54.6 ± 13.7   | 0.07  |
| Diagnosis                             |                   |               |       |                   |               |       |
| Kidney transplantation                | 193 (68.2)        | 205 (85.8)    | 0.4   | 141 (84.4)        | 141 (84.4)    | 0     |
| Chronic kidney disease                | 74 (26.2)         | 60 (25.1)     | -0.02 | 44 (26.4)         | 45 (27.0)     | -0.01 |
| Kidney donor                          | 40 (14.1)         | 10 (4.2)      | -0.4  | 7 (4.2)           | 8 (4.8)       | -0.02 |
| Hypertension                          | 159 (56.2)        | 184 (77.0)    | 0.5   | 109 (65.3)        | 121 (72.5)    | 0.1   |
| Diabetes Mellitus                     | 75 (26.5)         | 104 (43.5)    | 0.4   | 55 (32.9)         | 67 (40.1)     | 0.1   |
| Dyslipidemia                          | 176 (68.2)        | 175 (73.2)    | 0.2   | 121 (72.5)        | 122 (73.1)    | 0.01  |
| Number of outpatient visits           | 6.9 ± 3.5         | 10.4 ± 5.3    | 0.8   |                   |               | 0.07  |
| Number of medications                 | 7.4 ± 7.1         | 13.3 ± 10.4   | 0.7   |                   |               | 0.1   |
| Medications                           |                   |               |       |                   |               |       |
| Diuretics                             | 31 (11.0)         | 71 (29.7)     | 0.5   | 24 (14.4)         | 31 (18.6)     | 0.1   |
| Potassium-lowering agents             | 5 (1.8)           | 14 (5.9)      | 0.2   | 5 (3.0)           | 4 (2.4)       | -0.03 |
| Alkalizing agents                     | 11 (3.9)          | 31 (13.0)     | 0.3   | 8 (4.8)           | 8 (4.8)       | 0     |
| Antibiotics                           | 82 (29.0)         | 116 (48.5)    | 0.4   | 61 (36.5)         | 68 (40.7)     | 0.09  |
| Immunosuppressants                    | 196 (69.3)        | 205 (85.8)    | 0.4   | 141 (84.4)        | 141 (84.4)    | 0     |
| CKD_MBD medications                   | 34 (12.0)         | 59 (24.7)     | 0.3   | 25 (15.0)         | 24 (14.4)     | -0.02 |
| Laboratory findings                   |                   |               |       |                   |               |       |
| Serum creatinine (mg/dL)              | 1.29 ± 0.7        | 1.5 ± 1.0     | 0.3   | 1.29 ± 0.7        | 1.3 ± 0.7     | 0.04  |
| BUN (mg/dL)                           | 19.39 ± 9.5       | 24.1 ± 13.1   | 0.4   | 20.6 ± 11.3       | 21.2 ± 9.2    | 0.06  |
| eGFR(mL/min/1.73m <sup>2</sup> )      | 64.49 ± 21.4      | 55.9 ± 23.2   | -0.4  | 62.5 ± 21.6       | 60.3 ± 21.6   | -0.1  |
| Calcium (mg/dL)                       | 9.4 ± 0.4         | 9.3 ± 0.5     | -0.2  | 9.4 ± 0.5         | 9.3 ± 0.5     | -0.06 |
| Cholesterol (mg/dL)                   | 182.1 ± 30.1      | 181.7 ± 33.5  | -0.01 | 184.0 ± 29.7      | 182.4 ± 32.8  | -0.05 |
| Glucose (mg/dL)                       | 108.1 ± 25.5      | 113.7 ± 44.0  | 0.2   | 111.9 ± 30.1      | 114.1 ± 43.4  | 0.06  |
| Hemoglobin (g/dL)                     | 13.6 ± 1.7        | 13.2 ± 0.8    | -0.2  | 13.5 ± 1.8        | 13.3 ± 1.8    | -0.1  |
| Albumin (g/dL)                        | 4.5 ± 0.3         | 4.3 ± 0.4     | -0.3  | 4.4 ± 0.4         | 4.4 ± 0.4     | -0.08 |
| Total bilirubin (mg/dL)               | 0.8 ± 0.3         | 0.8 ± 0.3     | 0.2   | 0.8 ± 0.4         | 0.8 ± 0.3     | -0.04 |
| Uric acid (mg/dL)                     | 5.8 ± 1.5         | 6.1 ± 1.7     | 0.2   | 5.8 ± 1.5         | 5.9 ± 1.6     | -0.1  |
| Platelet (10 <sup>9</sup> /L)         | 224.2 ± 57.5      | 221 ± 59.0    | -0.06 | 222.7 ± 60.5      | 223.2 ± 59.9  | 0.01  |
| White Blood Cell (10 <sup>9</sup> /L) | 7.0 ± 1.9         | 7.4 ± 2.5     | 0.2   | 7.2 ± 1.9         | 7.3 ± 2.3     | 0.07  |

**Supplementary Table S2.** Sensitivity Analysis for Study Outcomes

| Outcomes                                                                                     | Incidence or measured change   |                                | aOR or <i>P</i> value |
|----------------------------------------------------------------------------------------------|--------------------------------|--------------------------------|-----------------------|
|                                                                                              | Control                        | PCS                            |                       |
| <i>End Stage Renal Disease</i>                                                               | 30/167 (17.9)                  | 19/167(11.3)                   | 0.34 (0.14 – 0.78)    |
| <i>Change in estimated glomerular filtration rate between before and after study period.</i> | -6.8 mL/min/1.73m <sup>2</sup> | -1.7 mL/min/1.73m <sup>2</sup> | 0.06                  |

Values are represented as number (%); aOR, adjusted odds ratio; PCS, pharmaceutical care services;
